# Supplementary material for: Increasing Legume Input through Interseeding Cover Crops: Soil and Crop Response as Affected by Tillage System
Source: MDPI journal article supplement (doi:10.3390/agronomy13051388), 2023-05-17
Supplement: s1 [file s1]

Archive with 1 entries (1 files):
- agronomy-2380816-SI.pdf
